# Supplementary material for: Ionotropic Glutamate Receptors Mediate Inducible Defense in the Water Flea Daphnia pulex
Source: PLoS One. 2015 Mar 23;10(3):e0121324. doi: 10.1371/journal.pone.0121324 (PMC4370714; doi:10.1371/journal.pone.0121324)
Supplement: S1 Table — (XLSX) [file pone.0121324.s002.xlsx]

## Sheet: Sheet1
S2_Table: Genes up- or down-regulated in response to predatory kairomone as determined by microarray analysis (FDR < 0.05)
FDR	Protein ID in wFleaBase	Annotation	Fold change (Kairomone/Control)
			1 hr	5 hr
Up-regulation (45)
0.0290381	263197	Glutamate-gated AMPA-type ion channel receptor subunit GluR2 and related subunits	1.67497	1.45946
0.0311743	113100	No description	1.33204	1.31209
0.0327115	266275	C-type lectin	1.46683	1.35079
0.0343551	279617	No description	1.27106	1.20885
0.0345683	51873	Natriuretic peptide receptor. guanylate cyclase	1.32146	1.31434
0.0366497	106203	No description	1.27583	1.22199
0.0369421	103145	No description	1.22095	1.20005
0.0369421	110892	No description	1.31561	1.32918
0.0373668	342112	No description	1.25223	1.24533
0.0381565	245814	R-kappa-B and related transcription factors	1.23354	1.16818
0.0382965	331858	No description	1.29681	1.29657
0.0384534	331564	No description	1.38325	1.27036
0.0388522	337560	No description	1.14219	1.17503
0.0391398	316535	No description	1.33904	1.26179
0.0403393	330735	Neurexin IV	1.19491	1.28218
0.0404426	271062	No description	1.2972	1.33663
0.0405445	311149	Triacylglycerol lipase. Glycerolipid metabolism,Triglyceride lipase-cholesterol esterase	1.45082	1.43727
0.0411097	301907	Helicases	1.28002	1.22284
0.0420276	266209	No description	1.44757	1.35257
0.0420276	101971	No description	1.3042	1.31777
0.042052	23177	Speckle-type POZ protein SPOP and related proteins with TRAF. MATH and BTB/POZ domains	1.17278	1.22864
0.0421681	306711	Adaptor protein NCK/Dock. contains SH2 and SH3 domains	1.15279	1.13485
0.0424639	62190	Predicted transmembrane protein of the immunoglobulin family of cell adhesion molecules	1.17362	1.18097
0.0433624	273915	No description	1.30655	1.19171
0.0449706	326443	Enteropeptidase. ,C-type lectin	1.40185	1.29185
0.0451837	267421	No description	1.17172	1.13545
0.0453897	311900	Apolipoprotein D/Lipocalin	1.16328	1.16296
0.0453897	104318	No description	1.36349	1.27165
0.0459342	245387	No description	1.21237	1.15762
0.0459822	300849	Fatty acid-binding protein FABP	1.24028	1.16052
0.0459822	110924	No description	1.49924	1.29086
0.0461107	314297	Sodium/hydrogen exchanger protein	1.20289	1.13695
0.0462746	30877	Tyrosine kinase specific for activated (GTP-bound) p21cdc42Hs	1.14435	1.2214
0.046718	108253	Splicing coactivator SRm160/300. subunit SRm300	1.19248	1.1733
0.0468683	108800	GABA-B ion channel receptor subunit GABABR1 and related subunits. G-protein coupled receptor superfamily	1.23163	1.19031
0.0470412	24264	FOG: 7 transmembrane receptor	1.17971	1.31576
0.0476235	340660	No description	1.13189	1.13953
0.0477816	110204	No description	1.22765	1.26854
0.0478508	107474	No description	1.36977	1.21917
0.0480295	227827	No description	1.17357	1.25107
0.0480879	346052	No description	1.36072	1.22289
0.048496	94695	No description	1.1852	1.27162
0.0487162	236859	No description	1.21574	1.13903
0.0491475	52038	Casein kinase (serine/threonine/tyrosine protein kinase)	1.16727	1.12425
0.049521	300056	Hexokinase	1.14295	1.18113
Down-regulation (29)
0.0290381	109655	No description	0.732212	0.684157
0.0311743	224392	Neurexin IV	0.807201	0.791046
0.0312897	331305	No description	0.679086	0.747079
0.0335303	305303	Microtubule-associated protein CRIPT	0.729358	0.753232
0.0368268	303769	Nucleolar GTPase/ATPase p130	0.723534	0.778319
0.0368564	259866	Mitochondrial F1F0-ATP synthase. subunit b/ATP4	0.695393	0.707891
0.0371205	228199	No description	0.805115	0.828764
0.0371205	330175	No description	0.830355	0.853995
0.0371285	227614	Neurexin IV	0.812027	0.811596
0.037136	108321	No description	0.846902	0.846745
0.037136	318741	No description	0.854232	0.807182
0.0382516	302639	Predicted E3 ubiquitin ligase	0.816486	0.813887
0.0392948	302125	Ubiquitin/60s ribosomal protein L40 fusion	0.803146	0.76539
0.0400428	330178	Ras1 guanine nucleotide exchange factor	0.755219	0.829684
0.0405445	204587	Vacuolar sorting protein VPS52/suppressor of actin Sac2	0.812703	0.815506
0.0413444	116146	Transcription regulator XNP/ATRX. DEAD-box superfamily	0.834355	0.827826
0.0417836	302124	No description	0.803071	0.775178
0.0439509	308736	Uncharacterized conserved protein (tumor-associated antigen HCA127 in humans)	0.8761	0.873997
0.0439622	251067	No description	0.69934	0.801607
0.0445948	265234	No description	0.868341	0.814225
0.045195	97874	Predicted coiled-coil protein	0.827692	0.746131
0.0459342	97163	Tetraspanin family integral membrane protein	0.778067	0.819491
0.0480295	114901	Nucleolar GTPase/ATPase p130	0.846295	0.887242
0.0491848	299999	No description	0.763024	0.782285
0.0492886	123496	DNA damage-responsive repressor GIS1/RPH1. jumonji superfamily	0.809929	0.860074
0.0493445	262479	No description	0.810284	0.82953
0.0493624	299560	No description	0.876707	0.869626
0.0495295	66922	FOG: Reverse transcriptase	0.785491	0.86808
0.0498988	237282	Leucine rich repeat proteins. some proteins contain F-box	0.881093	0.853088
