# Supplementary material for: Ionotropic Glutamate Receptors Mediate Inducible Defense in the Water Flea Daphnia pulex
Source: PLoS One. 2015 Mar 23;10(3):e0121324. doi: 10.1371/journal.pone.0121324 (PMC4370714; doi:10.1371/journal.pone.0121324)
Supplement: S3 Table — (XLSX) [file pone.0121324.s004.xlsx]

## Sheet: Sheet1
S4_Table: Gene models containing the GO term ionotropic glutamate receptor activity (GO:0004970)
Protein ID in wFleaBase	Annotation	Fold change (Kairomone/Control)
		1 hr	5 hr
23710	Glutamate-gated NMDA-type ion channel receptor subunit GRIN2A and related subunits	1.18627	1.05156
41686	Glutamate-gated NMDA-type ion channel receptor subunit GRIN2A and related subunits	1.01031	1.17094
55220	Glutamate-gated kainate-type ion channel receptor subunit GluR5 and related subunits	0.859856	0.969738
55388	Glutamate-gated kainate-type ion channel receptor subunit GluR5 and related subunits	0.879161	0.996494
98389	Glutamate-gated kainate-type ion channel receptor subunit GluR5 and related subunits	1.17452	1.08065
101545	Glutamate-gated kainate-type ion channel receptor subunit GluR5 and related subunits	0.770642	0.947698
101550	Glutamate-gated kainate-type ion channel receptor subunit GluR5 and related subunits	1.24114	1.10627
104187	Glutamate-gated kainate-type ion channel receptor subunit GluR5 and related subunits	1.23622	1.17229
104438	Glutamate-gated kainate-type ion channel receptor subunit GluR5 and related subunits	1.5524	1.19798
105539	Glutamate-gated NMDA-type ion channel receptor subunit GRIN2A and related subunits	1.34326	1.1469
105549	Glutamate-gated NMDA-type ion channel receptor subunit GRIN2A and related subunits	0.854587	0.921635
105942	Glutamate-gated AMPA-type ion channel receptor subunit GluR2 and related subunits	1.15053	1.20603
241220	NMDA selective glutamate-gated ion channel receptor subunit GRIN1	1.76794	1.37335
241222	Glutamate-gated kainate-type ion channel receptor subunit GluR5 and related subunits	1.83045	1.25716
241224	Glutamate-gated kainate-type ion channel receptor subunit GluR5 and related subunits	1.128	1.30646
241335	Glutamate-gated kainate-type ion channel receptor subunit GluR5 and related subunits	0.641639	0.856248
241432	Glutamate-gated kainate-type ion channel receptor subunit GluR5 and related subunits	0.897676	0.851395
245402	Glutamate-gated kainate-type ion channel receptor subunit GluR5 and related subunits	0.763041	0.793646
255143	NMDA selective glutamate-gated ion channel receptor subunit GRIN1	1.10081	1.37497
256141	Glutamate-gated kainate-type ion channel receptor subunit GluR5 and related subunits	1.2283	0.973307
263197	Glutamate-gated AMPA-type ion channel receptor subunit GluR2 and related subunits	1.67497	1.45946
263387	Glutamate-gated kainate-type ion channel receptor subunit GluR5 and related subunits	0.837987	0.935969
300036	Glutamate-gated kainate-type ion channel receptor subunit GluR5 and related subunits	1.45572	1.06017
302648	Glutamate-gated kainate-type ion channel receptor subunit GluR5 and related subunits	1.06955	1.0233
304325	Glutamate-gated kainate-type ion channel receptor subunit GluR5 and related subunits	0.83291	0.933141
309629	Glutamate-gated kainate-type ion channel receptor subunit GluR5 and related subunits	1.32051	1.09533
309661	Glutamate-gated kainate-type ion channel receptor subunit GluR5 and related subunits	0.867659	0.947523
312020	Glutamate-gated kainate-type ion channel receptor subunit GluR5 and related subunits	0.840353	0.984957
312492	Glutamate-gated kainate-type ion channel receptor subunit GluR5 and related subunits	0.692203	0.903899
312495	Glutamate-gated kainate-type ion channel receptor subunit GluR5 and related subunits	1.02959	1.27288
313110	Glutamate-gated kainate-type ion channel receptor subunit GluR5 and related subunits	0.741028	0.833604
313288	Glutamate-gated kainate-type ion channel receptor subunit GluR5 and related subunits	1.22289	1.49295
313560	Glutamate-gated kainate-type ion channel receptor subunit GluR5 and related subunits	0.947523	0.996356
313582	Glutamate-gated kainate-type ion channel receptor subunit GluR5 and related subunits	0.81383	0.814489
313603	Glutamate-gated kainate-type ion channel receptor subunit GluR5 and related subunits	0.841732	0.976799
313613	Glutamate-gated kainate-type ion channel receptor subunit GluR5 and related subunits	1.09119	1.08885
313621	Glutamate-gated kainate-type ion channel receptor subunit GluR5 and related subunits	1.17097	1.22487
313634	Glutamate-gated kainate-type ion channel receptor subunit GluR5 and related subunits	1.21467	1.10849
315894	Glutamate-gated kainate-type ion channel receptor subunit GluR5 and related subunits	0.926695	0.923041
316351	Glutamate-gated kainate-type ion channel receptor subunit GluR5 and related subunits	0.993253	0.970029
316697	NMDA selective glutamate-gated ion channel receptor subunit GRIN1	0.817354	0.99707
316758	Glutamate-gated kainate-type ion channel receptor subunit GluR5 and related subunits	0.767001	0.904045
316759	Glutamate-gated kainate-type ion channel receptor subunit GluR5 and related subunits	1.78188	1.36166
316784	Glutamate-gated kainate-type ion channel receptor subunit GluR5 and related subunits	1.43555	1.09563
316785	Glutamate-gated kainate-type ion channel receptor subunit GluR5 and related subunits	0.741353	0.816467
316802	Glutamate-gated kainate-type ion channel receptor subunit GluR5 and related subunits	1.11638	1.1134
316803	Glutamate-gated kainate-type ion channel receptor subunit GluR5 and related subunits	1.2255	1.25626
316806	Glutamate-gated kainate-type ion channel receptor subunit GluR5 and related subunits	1.34397	1.12148
316861	Glutamate-gated kainate-type ion channel receptor subunit GluR5 and related subunits	1.22941	1.04505
316873	Glutamate-gated kainate-type ion channel receptor subunit GluR5 and related subunits	1.27571	1.01429
318335	Glutamate-gated kainate-type ion channel receptor subunit GluR5 and related subunits	0.749205	0.940087
319157	Glutamate-gated kainate-type ion channel receptor subunit GluR5 and related subunits	1.35282	1.12657
319610	NMDA selective glutamate-gated ion channel receptor subunit GRIN1	1.56323	0.998223
319673	Glutamate-gated kainate-type ion channel receptor subunit GluR5 and related subunits	1.24114	1.17868
320132	Glutamate-gated kainate-type ion channel receptor subunit GluR5 and related subunits	1.60792	1.33028
320340	Glutamate-gated kainate-type ion channel receptor subunit GluR5 and related subunits	1.38674	1.22024
321184	Glutamate-gated AMPA-type ion channel receptor subunit GluR2 and related subunits	0.842063	0.926545
323372	Glutamate-gated kainate-type ion channel receptor subunit GluR5 and related subunits	1.34326	1.07356
326779	Glutamate-gated AMPA-type ion channel receptor subunit GluR2 and related subunits	0.889336	0.843523
327034	Glutamate-gated kainate-type ion channel receptor subunit GluR5 and related subunits	1.27547	1.10691
327119	Glutamate-gated kainate-type ion channel receptor subunit GluR5 and related subunits	0.940087	0.989131
327312	Glutamate-gated kainate-type ion channel receptor subunit GluR5 and related subunits	1.22609	1.12181
328300	Glutamate-gated kainate-type ion channel receptor subunit GluR5 and related subunits	1.15647	1.08729
328925	Glutamate-gated kainate-type ion channel receptor subunit GluR5 and related subunits	0.990183	0.940783
332323	Glutamate-gated kainate-type ion channel receptor subunit GluR5 and related subunits	1.15074	1.13233
Protein ID: 263197 (bold) showed significant upregulation in response to predatory kairomone (see S2_Table)
